# Supplementary material for: Postexercise downregulation of NUP155 in regulating non-small cell lung cancer progression via the PTEN/AKT signaling pathway
Source: PubMed Central journal article supplement — Transl Cancer Res. 2024 Nov 27;13(11):6323–35. doi: 10.21037/tcr-24-1619 (PMC11651763; doi:10.21037/tcr-24-1619), 2024-11-27
Supplement: tcr-13-11-6323-dss.pdf [file tcr-13-11-6323-dss.pdf]

## Data Sharing Statement

|                     |                                                                                                                                                     |                                                                                                                                             |
|---------------------|-----------------------------------------------------------------------------------------------------------------------------------------------------|---------------------------------------------------------------------------------------------------------------------------------------------|
| <b>Article Info</b> | <a href="https://dx.doi.org/10.21037/tcr-24-1619">https://dx.doi.org/10.21037/tcr-24-1619</a>                                                       |                                                                                                                                             |
| <b>Item</b>         | <b>Question</b>                                                                                                                                     | <b>Authors' Response<br/>(place "-" if not applicable)</b>                                                                                  |
| 1                   | Would you like to share data collected for your study to others?                                                                                    | Yes.                                                                                                                                        |
| 2                   | If not, would you like to share the reason for your decision?                                                                                       | -                                                                                                                                           |
| 3                   | What data in particular will be shared?                                                                                                             | The raw data from our experiments will be shared, including qRT-PCR results, Western blotting data, and cell assay outcomes.                |
| 4                   | Any other documents will be shared? Such as study protocol, statistical analysis plan, informed consent form, clinical study report, analytic code. | Study protocol, statistical analysis plan, and analytic code will also be shared if requested.                                              |
| 5                   | When will data availability begin?                                                                                                                  | From the publication date.                                                                                                                  |
| 6                   | When will data availability end?                                                                                                                    | Two years within the publication date, since the technique or survival data may be updated over time.                                       |
| 7                   | To whom will you share the data?                                                                                                                    | Medical oncologists interested in NSCLC research.                                                                                           |
| 8                   | For what type of analysis or purpose?                                                                                                               | Used to explore the impact of exercise NSCLC or research on the treatment of NSCLC.                                                         |
| 9                   | How or where can the data/documents be obtained?                                                                                                    | Emails could be sent to the address below to obtain the shared data: <a href="mailto:jkyjs@mail.ecust.edu.cn">jkyjs@mail.ecust.edu.cn</a> . |
| 10                  | Any other restrictions?                                                                                                                             | We may balance the potential benefits and risks for each request and then provide the data that could be shared.                            |
